# Supplementary material for: One-step facile synthesis of nickel–chromium layered double hydroxide nanoflakes for high-performance supercapacitors
Source: Royal Society of Chemistry journal article supplement (doi:10.1039/d0na00178c), 2020-01-01
Supplement: d0na00178c1.pdf [file d0na00178c1.pdf]

## Supporting Information

### **One-step facile synthesis of nickel-chromium layered double hydroxides nanoflakes for high-performance supercapacitors**

Zuo Chen,<sup>‡a</sup> Hao Deng,<sup>‡a</sup> Man Zhang,<sup>a</sup> Zhiyu Yang,<sup>a</sup> Di Hu,<sup>a</sup> Yuchen Wang<sup>a</sup> and Kai Yan<sup>\*a, b</sup>

<sup>a</sup> School of Environmental Science and Engineering, Sun Yat-sen University, 135 Xingang Xi Road, Guangzhou 510275, P. R. China

<sup>b</sup> Guangdong Provincial Key Laboratory of Environmental Pollution Control and Remediation Technology, Guangzhou 510275, P. R. China

<sup>‡</sup>These Authors contribute equally to this work.

\* Corresponding author E-mail: yank9@mail.sysu.edu.cn

### Cleaning of Ni foam

The nickel foam should be cleaned before being loaded with the active materials. The nickel foams were ultrasonic treated for 1 h in 1 M HCl, then washed with ethanol (10 mL) and deionized water (10 mL) for three times, respectively. Finally, the Ni foam was dried at 70 °C for 12 h in vacuum.

**Table S1.** Textural properties of Ni<sub>1</sub>Cr<sub>1</sub>-LDNs, Ni<sub>2</sub>Cr<sub>1</sub>-LDNs and Ni<sub>3</sub>Cr<sub>1</sub>-LDNs.

| <b>Samples</b>                        | <b>S<sub>BET</sub><br/>(m<sup>2</sup> g<sup>-1</sup>)</b> | <b>V<sub>total</sub><br/>(cm<sup>3</sup> g<sup>-1</sup>)</b> | <b>Size adsor<br/>(Å)</b> |
|---------------------------------------|-----------------------------------------------------------|--------------------------------------------------------------|---------------------------|
| Ni <sub>1</sub> Cr <sub>1</sub> -LDNs | 62.541                                                    | 0.065                                                        | 18.053                    |
| Ni <sub>2</sub> Cr <sub>1</sub> -LDNs | 73.416                                                    | 0.073                                                        | 28.061                    |
| Ni <sub>3</sub> Cr <sub>1</sub> -LDNs | 63.286                                                    | 0.068                                                        | 21.067                    |

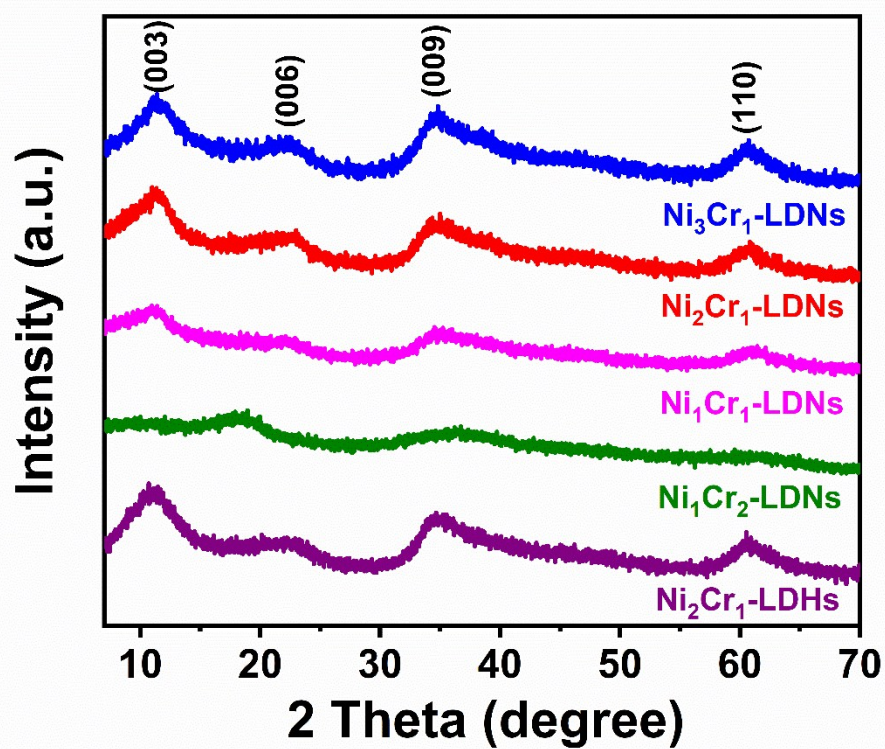

**Fig. S1** XRD patterns of Ni<sub>3</sub>Cr<sub>1</sub>-LDNs, Ni<sub>2</sub>Cr<sub>1</sub>-LDNs, Ni<sub>1</sub>Cr<sub>1</sub>-LDNs, Ni<sub>1</sub>Cr<sub>2</sub>-LDNs and Ni<sub>2</sub>Cr<sub>1</sub>-LDHs.

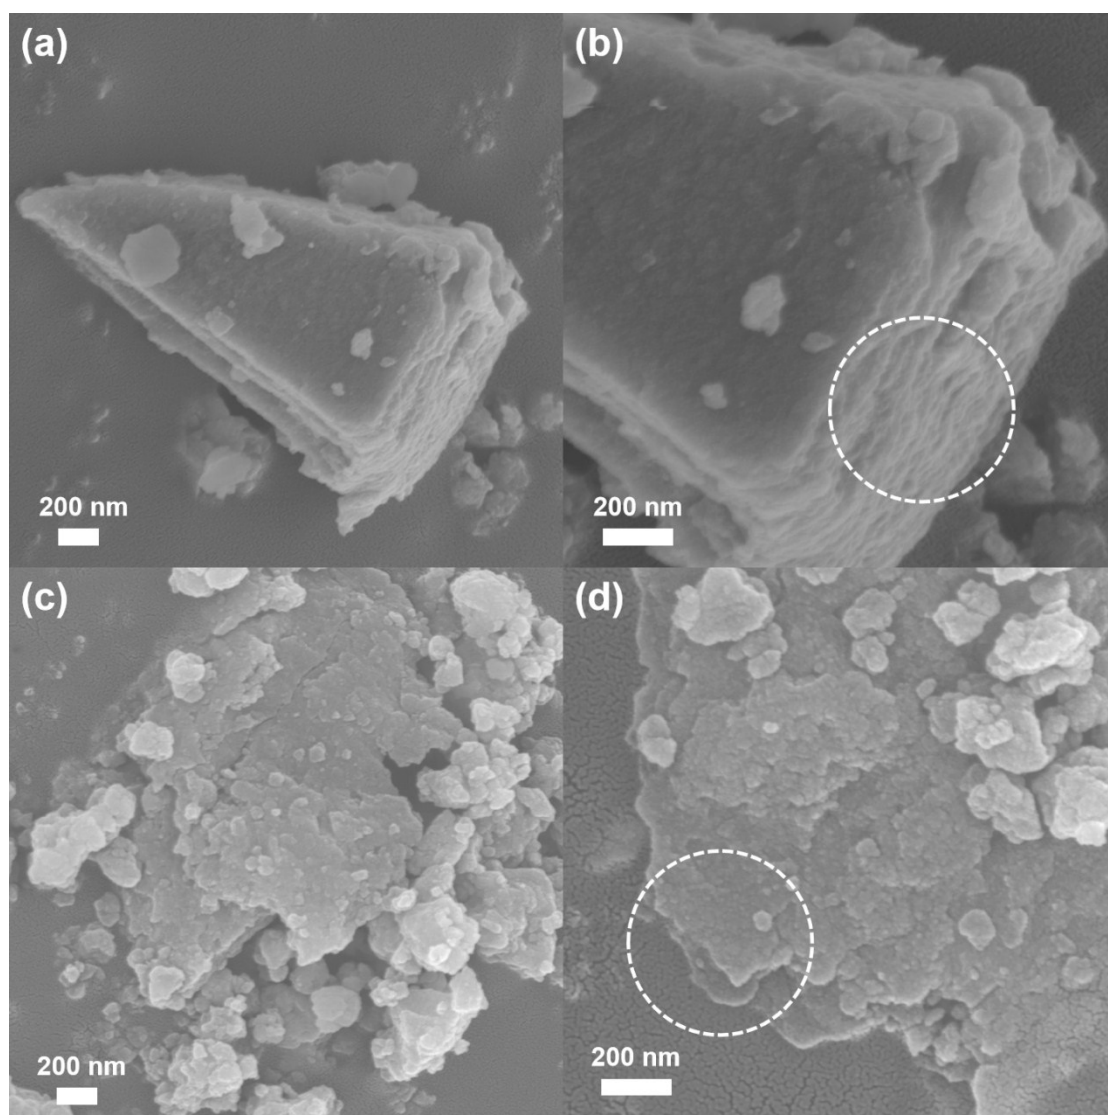

**Fig. S2** SEM images of the synthesized  $\text{Ni}_2\text{Cr}_1\text{-LDHs}$  (a) and (b);  $\text{Ni}_2\text{Cr}_1\text{-LDNs}$  (c) and (d).

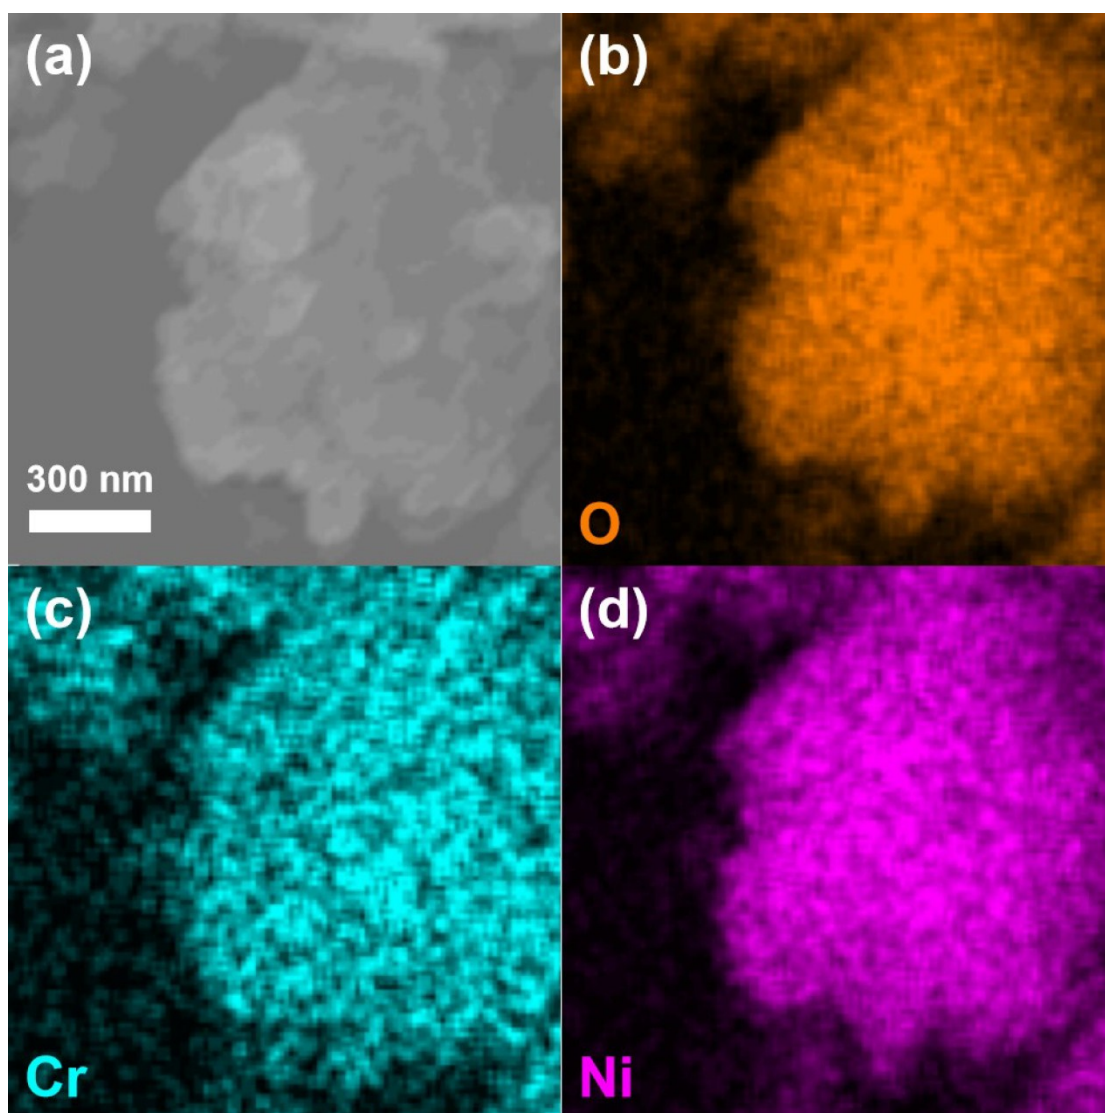

**Fig. S3** SEM image of the Ni<sub>2</sub>Cr<sub>1</sub>-LDNs (a) and the corresponding EDS mapping of O (b), Cr (c) and Ni (d) elements.

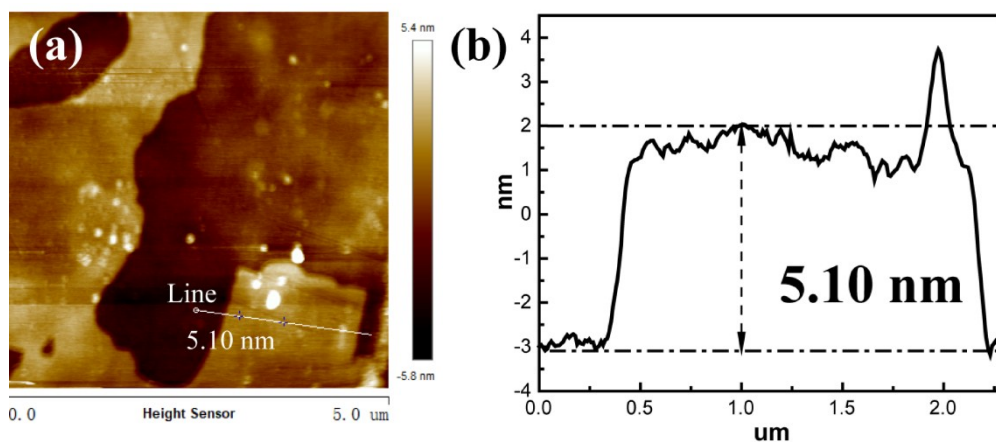

**Fig. S4** (a) AFM image and (b) the corresponding height profile of  $\text{Ni}_2\text{Cr}_1$ -LDNs.

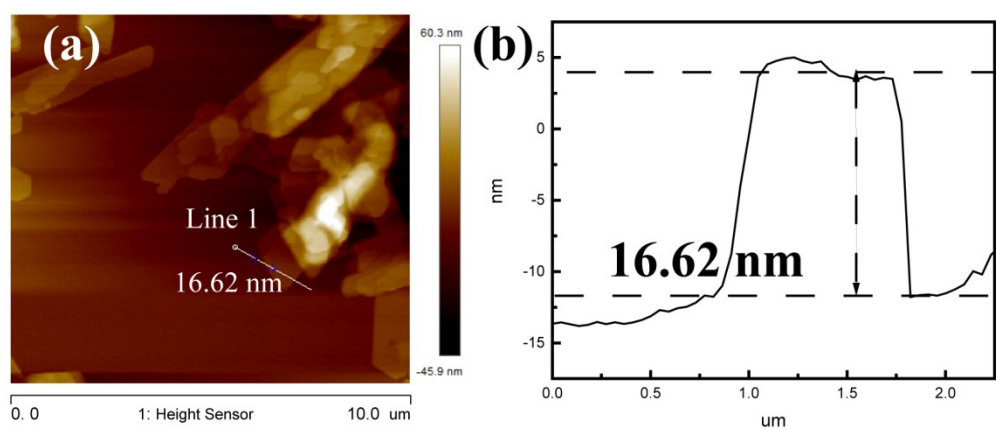

**Fig. S5** (a) AFM image and (b) the corresponding height profile of  $\text{Ni}_1\text{Cr}_1$ -LDNs.

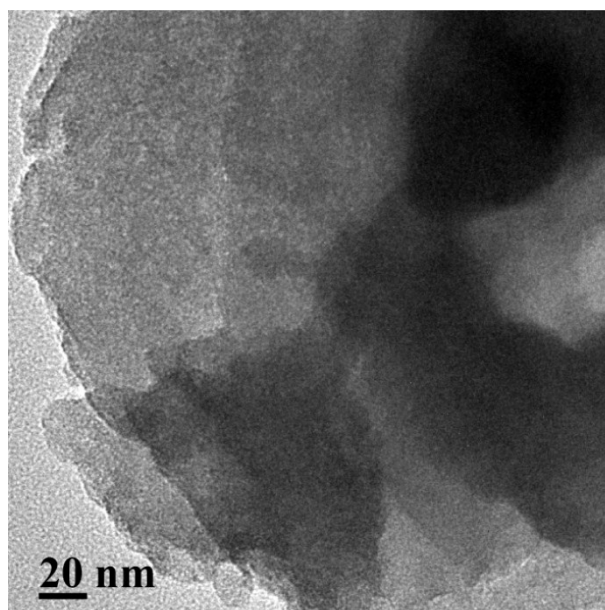

**Fig. S6** Transmission Electron Microscopy image of Ni<sub>1</sub>Cr<sub>1</sub>-LDNs.

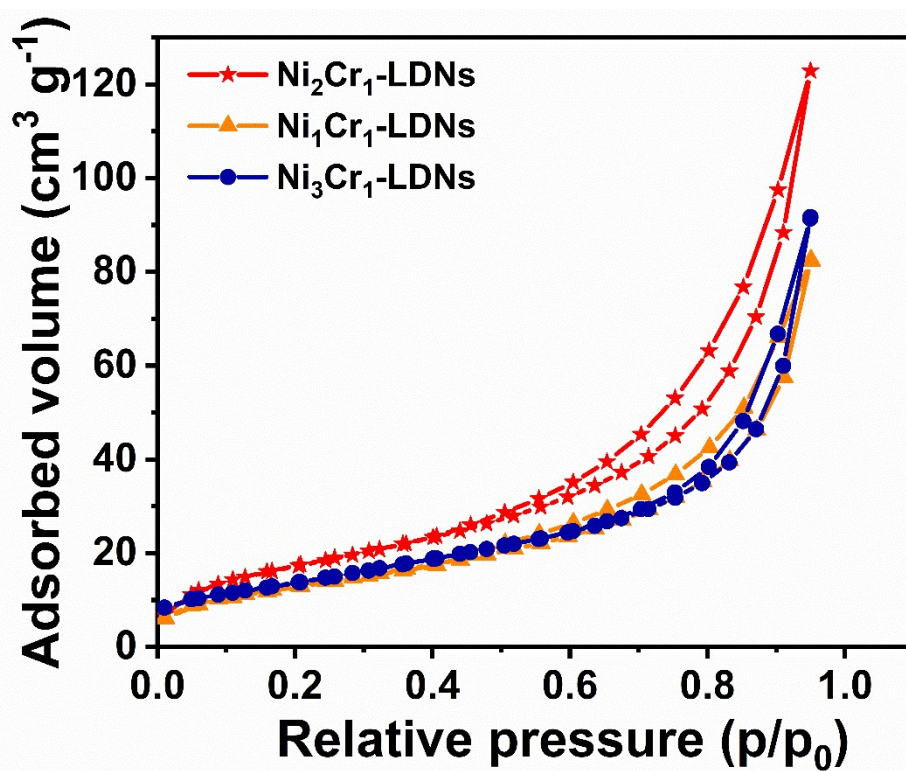

**Fig. S7** N<sub>2</sub> adsorption/desorption isotherms of Ni<sub>1</sub>Cr<sub>1</sub>-LDNs, Ni<sub>2</sub>Cr<sub>1</sub>-LDNs and Ni<sub>3</sub>Cr<sub>1</sub>-LDNs.



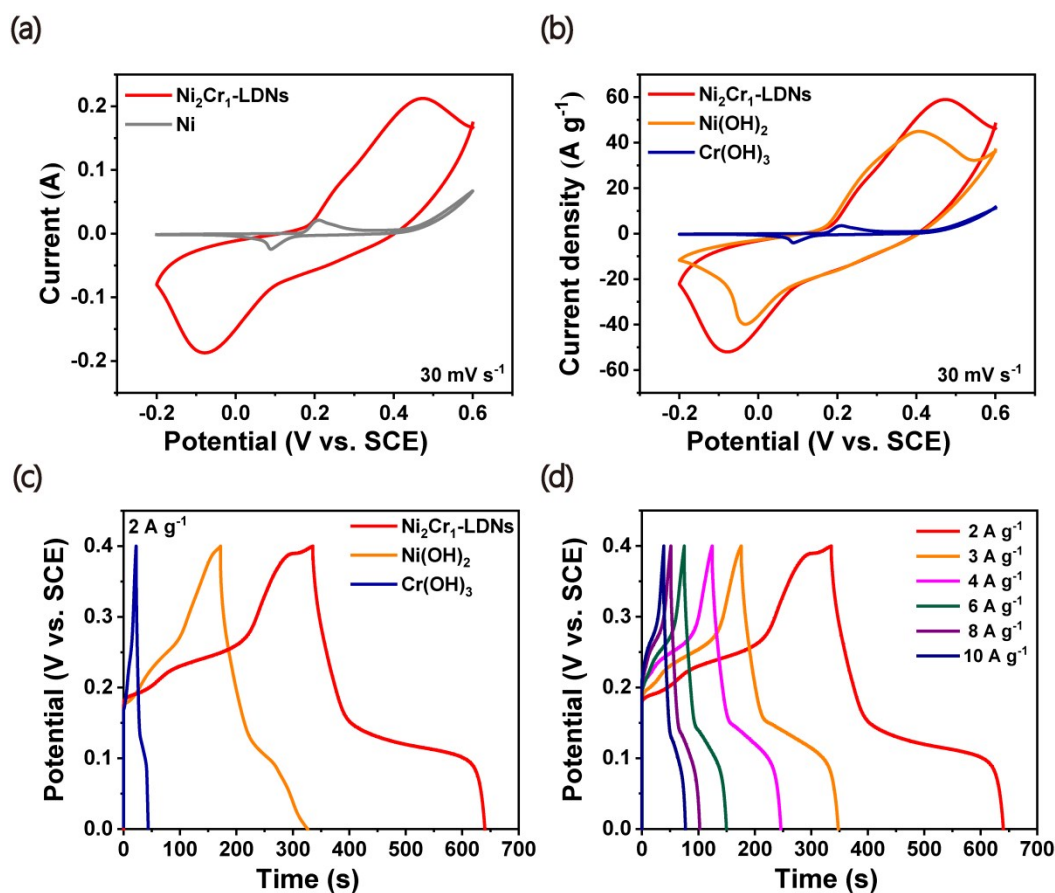

**Fig. S8** (a) CV curves of Ni<sub>2</sub>Cr<sub>1</sub>-LDNs and pure nickel foam at the scan rate of 30 mV s<sup>-1</sup> in 6 M KOH, (b) CV curves of Ni<sub>2</sub>Cr<sub>1</sub>-LDNs, Ni(OH)<sub>2</sub> and Cr(OH)<sub>3</sub> at the scan rate of 30 mV s<sup>-1</sup> in 6 M KOH, (c) GCD curves of Ni<sub>2</sub>Cr<sub>1</sub>-LDNs, Ni(OH)<sub>2</sub> and Cr(OH)<sub>3</sub> at current densities of 2 A g<sup>-1</sup>, (d) GCD curves of Ni<sub>2</sub>Cr<sub>1</sub>-LDNs at various current densities from 2 to 10 A g<sup>-1</sup>.

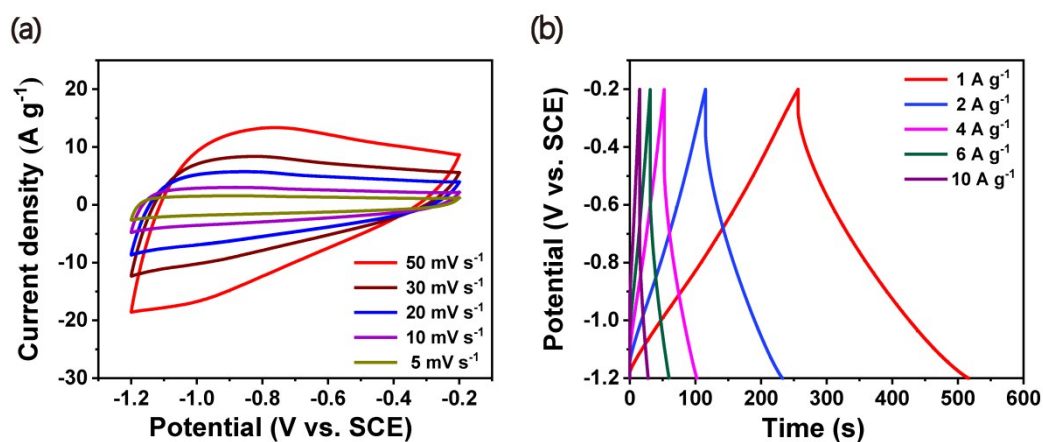

**Fig. S9** (a) CV curves of AC at different scan rates from 5 to 50 mV s<sup>-1</sup>, (b) GCD curves of AC at various current densities from 1 to 10 A g<sup>-1</sup>.

For

$$\log k_s = a \log(1-a) + (1-a) \log a - \log \frac{RT}{nFv} - \frac{a(1-a)nF\Delta E_p}{2.303RT} \quad (5)$$

where the values of T, n, R, F and a is 298, 1, 8.314, 96500 and 0.42, respectively.
